# Supplementary material for: Local Er(iii) environment in luminescent titanosilicates prepared from microporous precursorsElectronic supplementary information (ESI) available: Er LIII-edge k3-weighted EXAFS spectra and Fourier transforms. See http://www.rsc.org/suppdata/jm/b1/b107136j/
Source: Royal Society of Chemistry journal article supplement (doi:10.1039/b107136j), 2002-02-21

## Supplementary material

Er L<sub>III</sub>-edge  $k^3$ -weighted EXAFS spectra and Fourier transforms, phase-shift corrected for oxygen (—, experimental; - - - - -, curved wave theory)

(a) Er<sub>2</sub>O<sub>3</sub> (50 K)

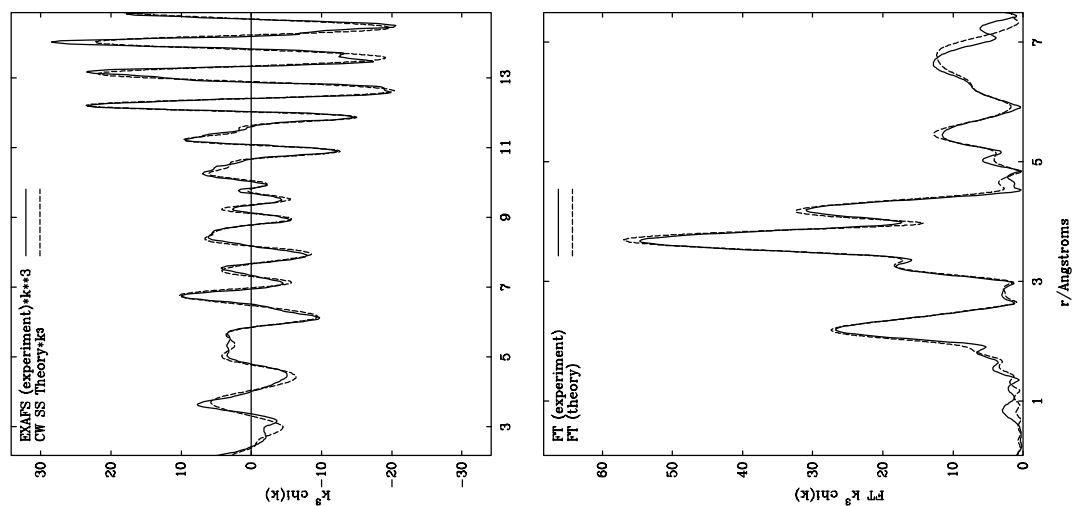

(b) Er<sup>3+</sup>-exchanged ETS-10 (higher erbium loading, 298 K, fit A in Table 1)

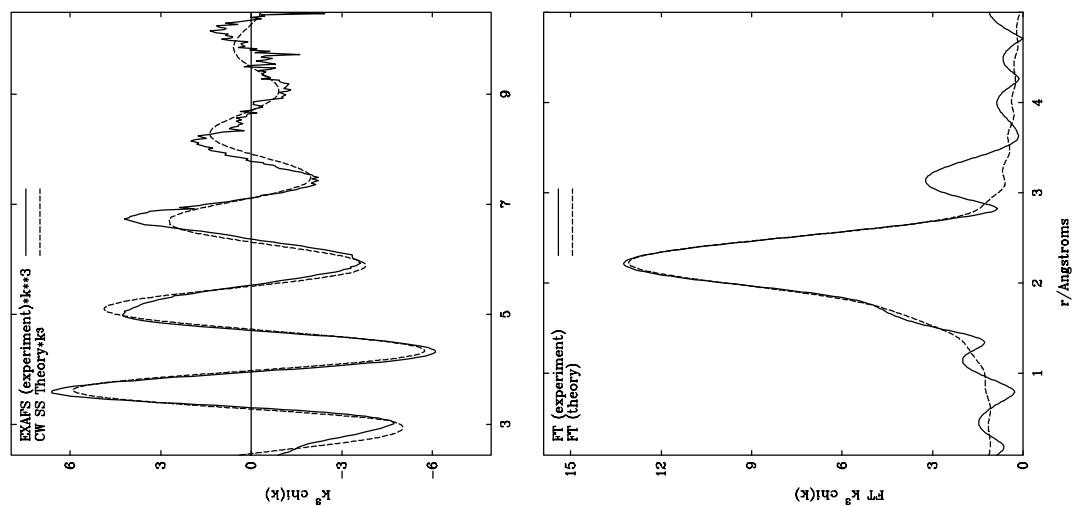

(c)  $\text{Er}^{3+}$ -exchanged ETS-10 (higher erbium loading, 298 K, fit B in Table 1)

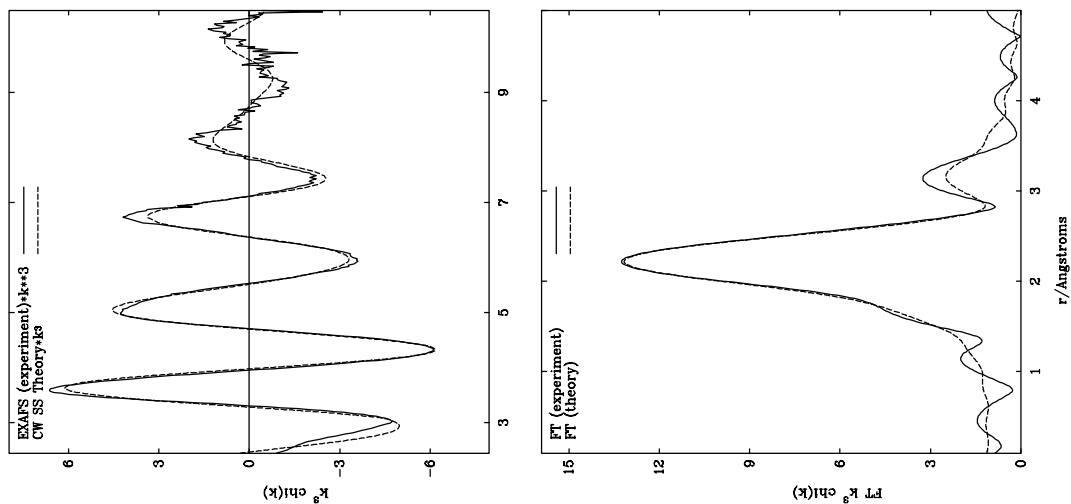

(d)  $\text{Er}^{3+}$ -exchanged ETS-10 (higher erbium loading, 50 K, fit A in Table 1)

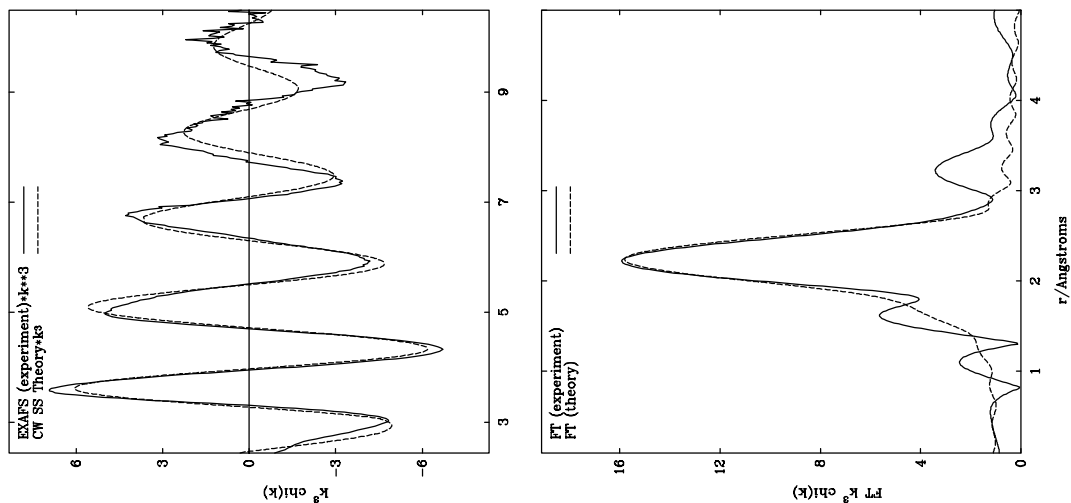

(e)  $\text{Er}^{3+}$ -exchanged ETS-10 (lower erbium loading, 298 K, fit A in Table 1)

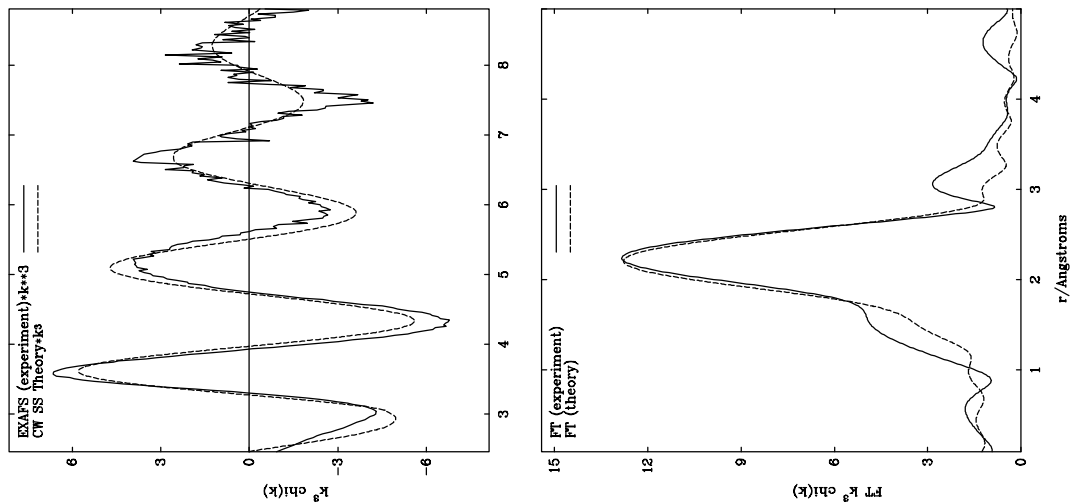

(f)  $\text{Er}^{3+}$ -exchanged ETS-10 (lower erbium loading, 50 K, fit A in Table 1)

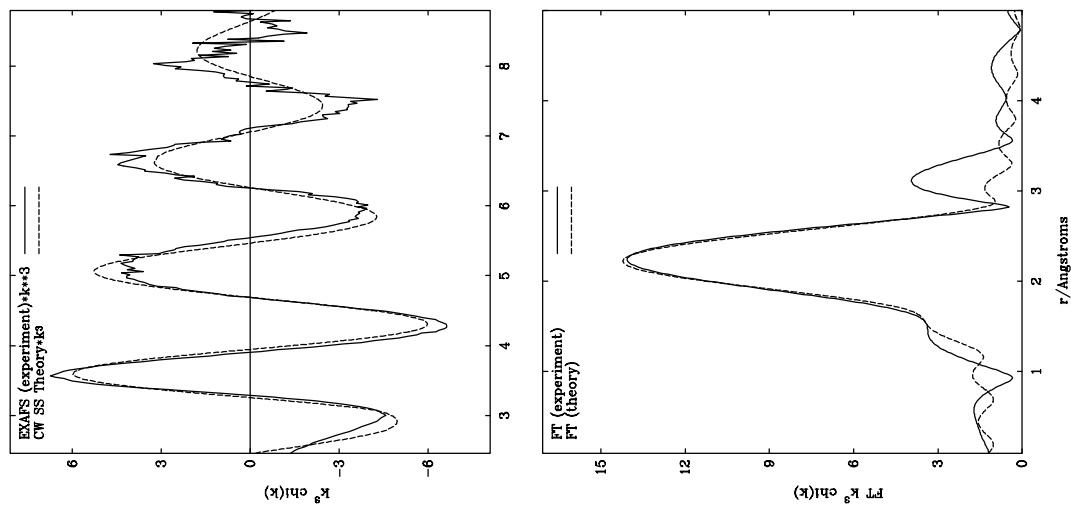

(g)  $\text{Er}^{3+}$ -exchanged ETS-10 (lower erbium loading, 50 K, fit B in Table 1)

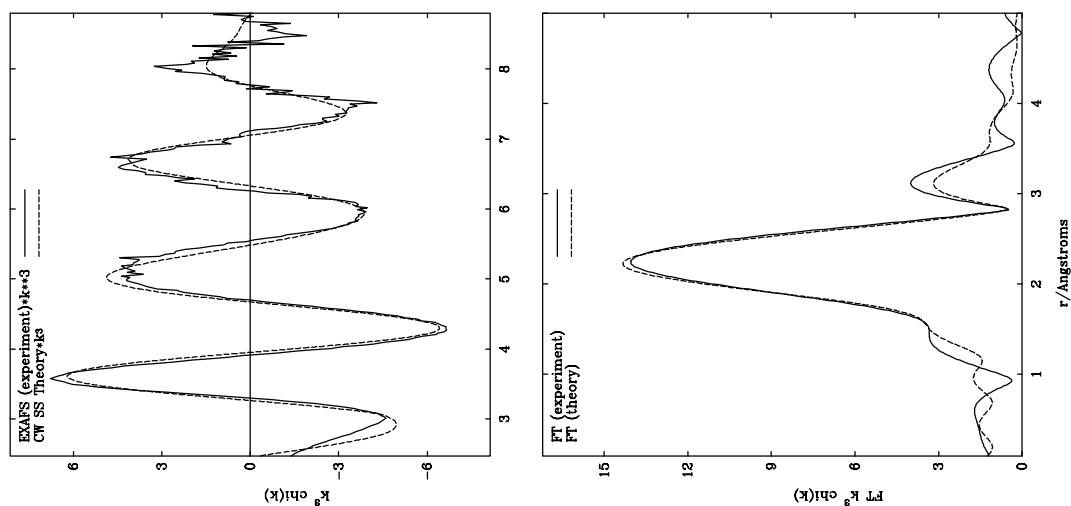

(h)  $\text{Er}^{3+}$ -exchanged ETS-10 (lower erbium loading) calcined at 973 K (298 K, fit A in Table 2)

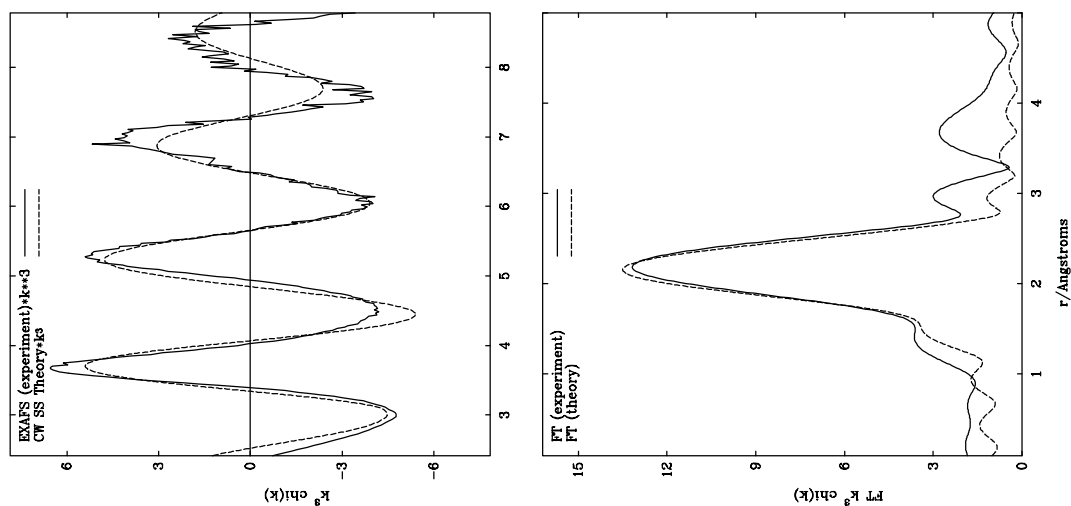

(i)  $\text{Er}^{3+}$ -exchanged ETS-10 (lower erbium loading) calcined at 973 K (50 K, fit A in Table 2)

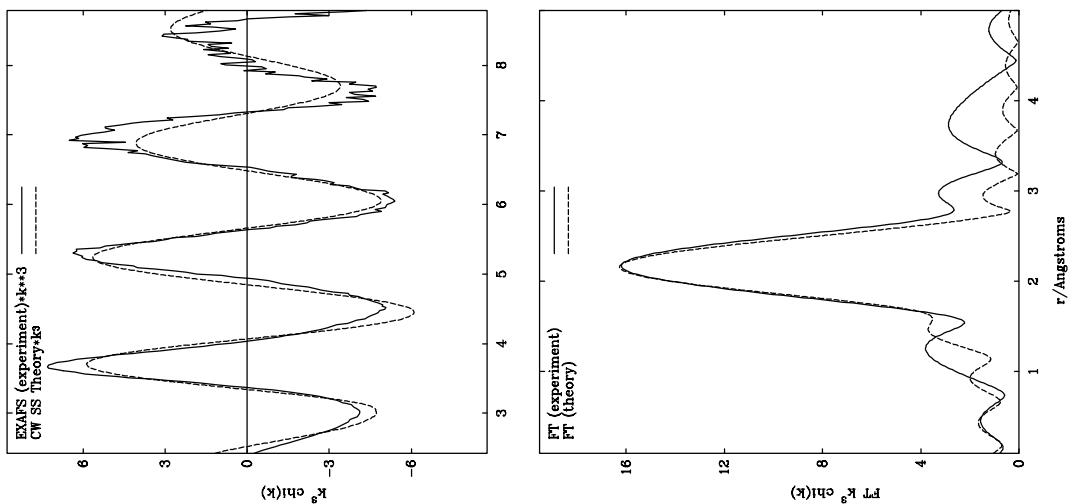

(j)  $\text{Er}^{3+}$ -exchanged ETS-10 (higher erbium loading) calcined at 1073 K (50 K, fit A in Table 2)

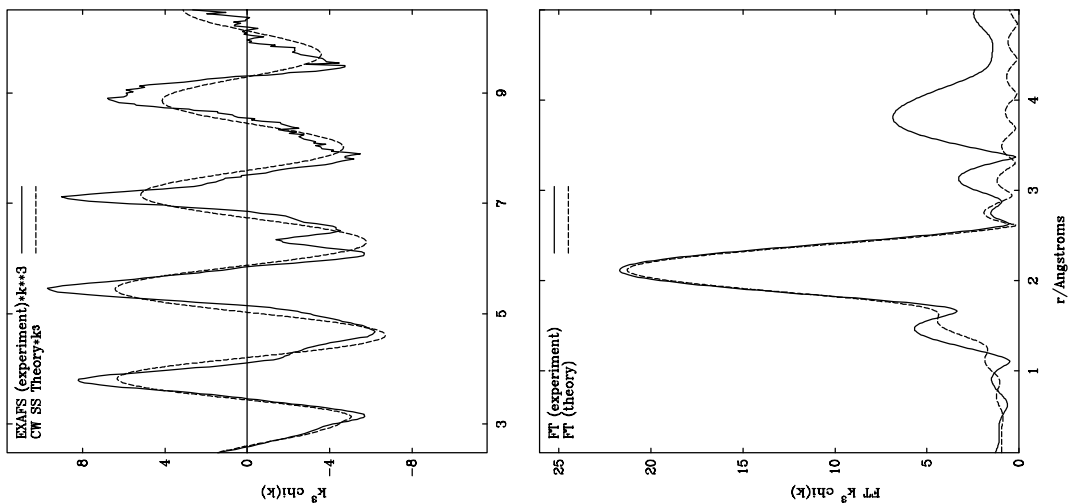

(k)  $\text{Er}^{3+}$ -exchanged ETS-10 (lower erbium loading) calcined at 1073 K (50 K, fit A in Table 2)

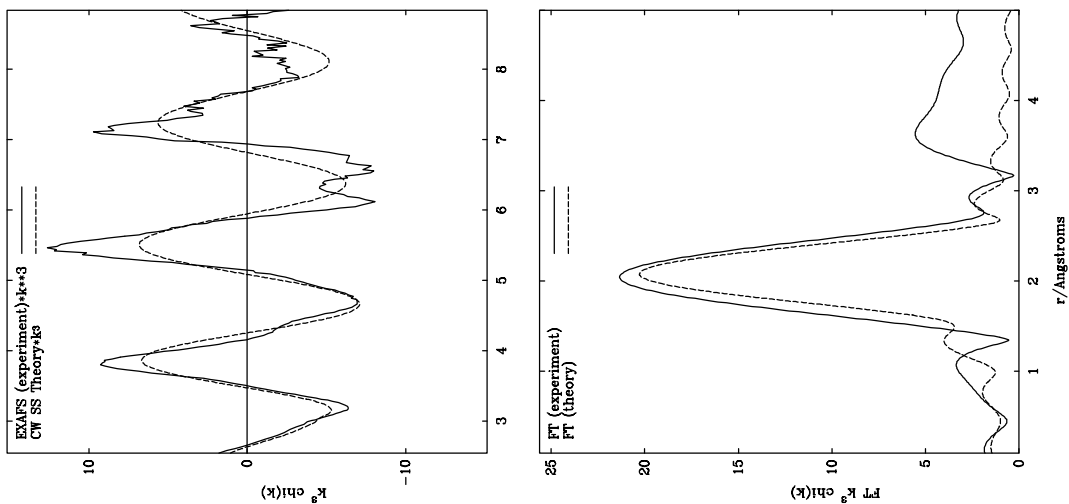

(l)  $\text{Er}^{3+}$ -exchanged ETS-10 (lower erbium loading) calcined at 1073 K (50 K, fit B in Table 2)

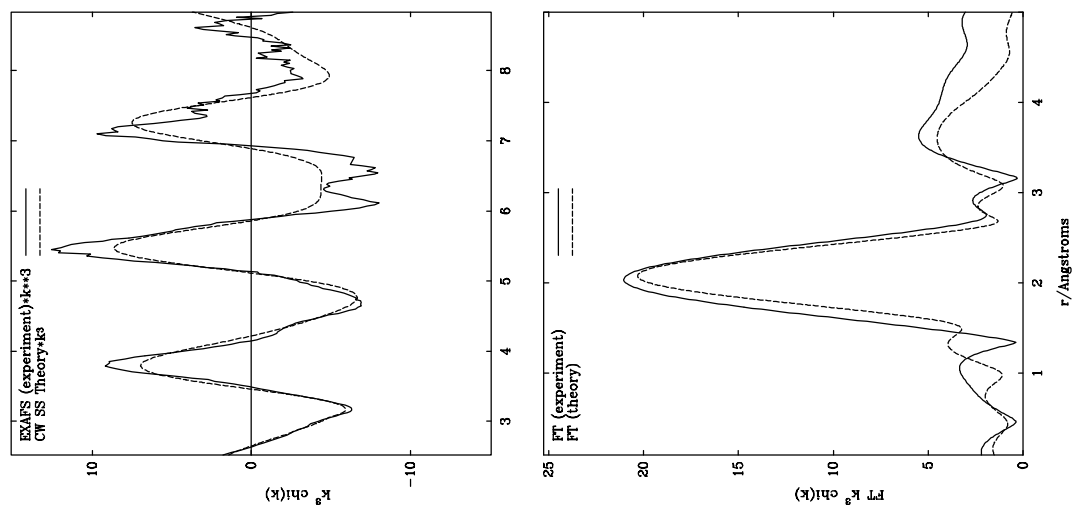

(m)  $\text{Er}^{3+}$ -exchanged ETS-10 (higher erbium loading) calcined at 1473 K (298 K, fit A in Table 2)

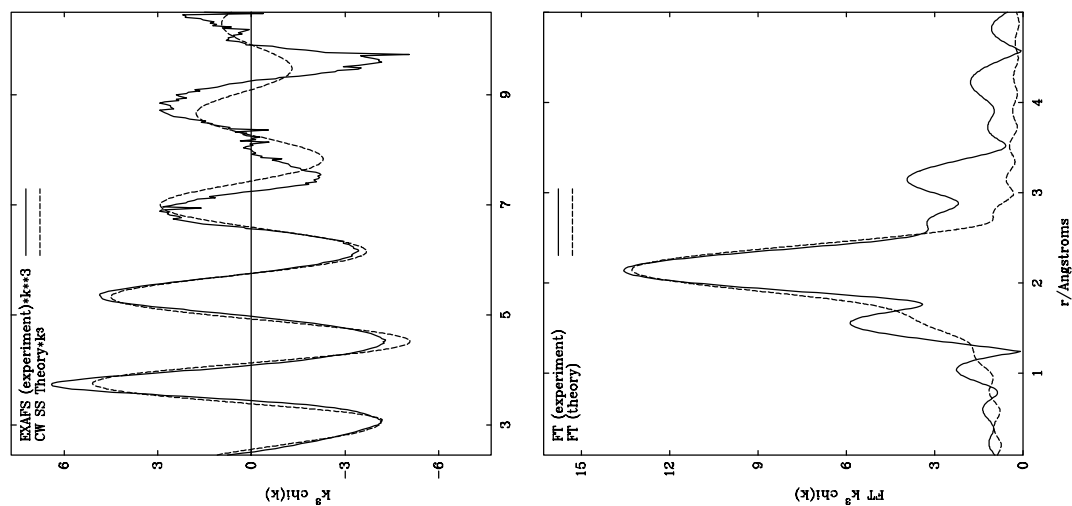

(n)  $\text{Er}^{3+}$ -exchanged ETS-10 (higher erbium loading) calcined at 1473 K (50 K, fit A in Table 2)

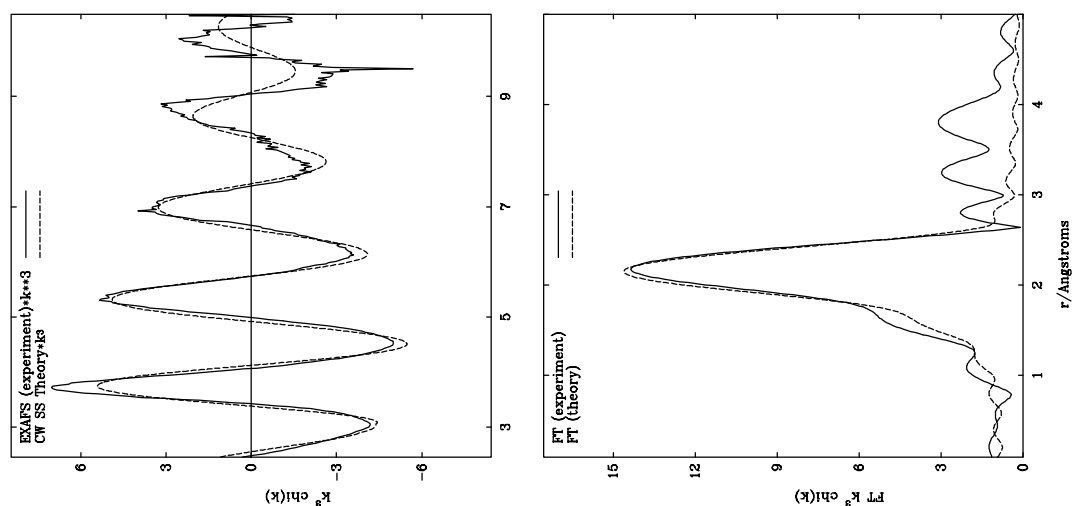

(o)  $\text{Er}^{3+}$ -exchanged ETS-10 (lower erbium loading) calcined at 1473 K (50 K, fit A in Table 2)

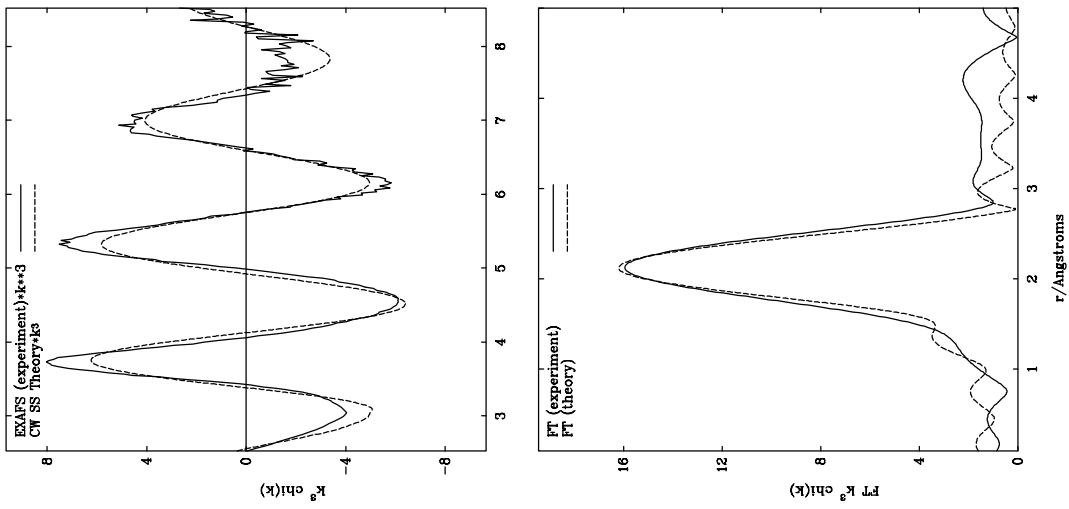

Supplement: b107136j.pdf [file b107136j.pdf]
